# Supplementary material for: Workplace Loneliness Through the Lens of Management Research: A Bibliometric and Thematic Exploration
Source: Research Square preprint supplement (doi:10.21203/rs.3.rs-7275428/v1), 2026-01-20
Supplement: Supplementary file 1 [file 208a7ec59cf6931e76e7796c.xlsx]

## Sheet: Sheet 1
AU
